# Supplementary material
Source: publisher figshare collection journal article supplement (https://tandf.figshare.com/ndownloader/files/13158350)

Supplementary Figure 1

A

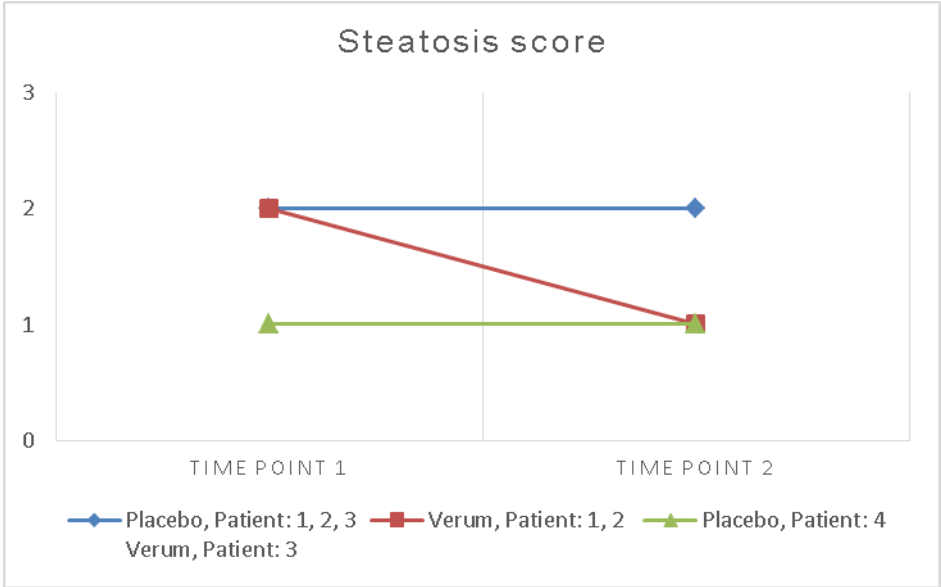

Supplementary Figure 1

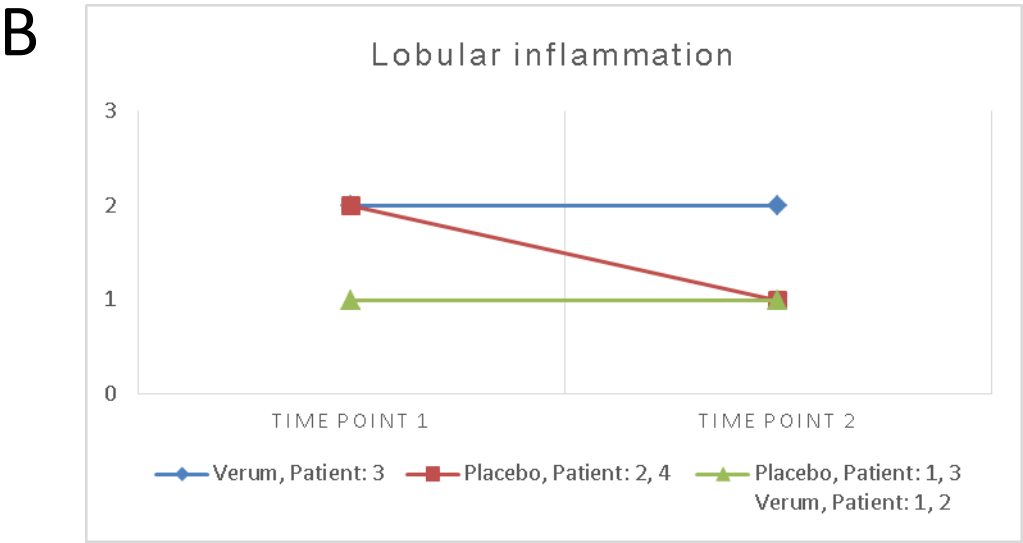

Supplementary Figure 1

C

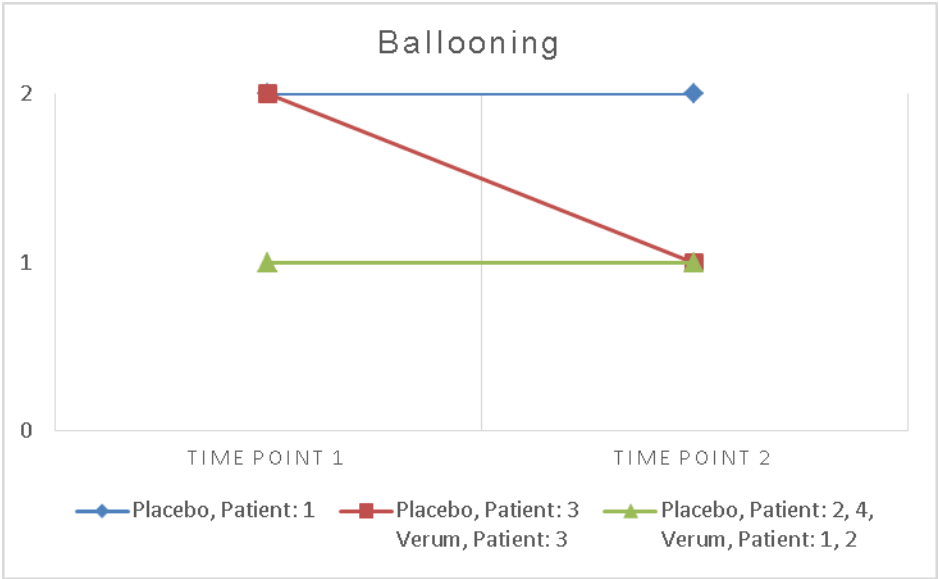

Supplementary Figure 1

D

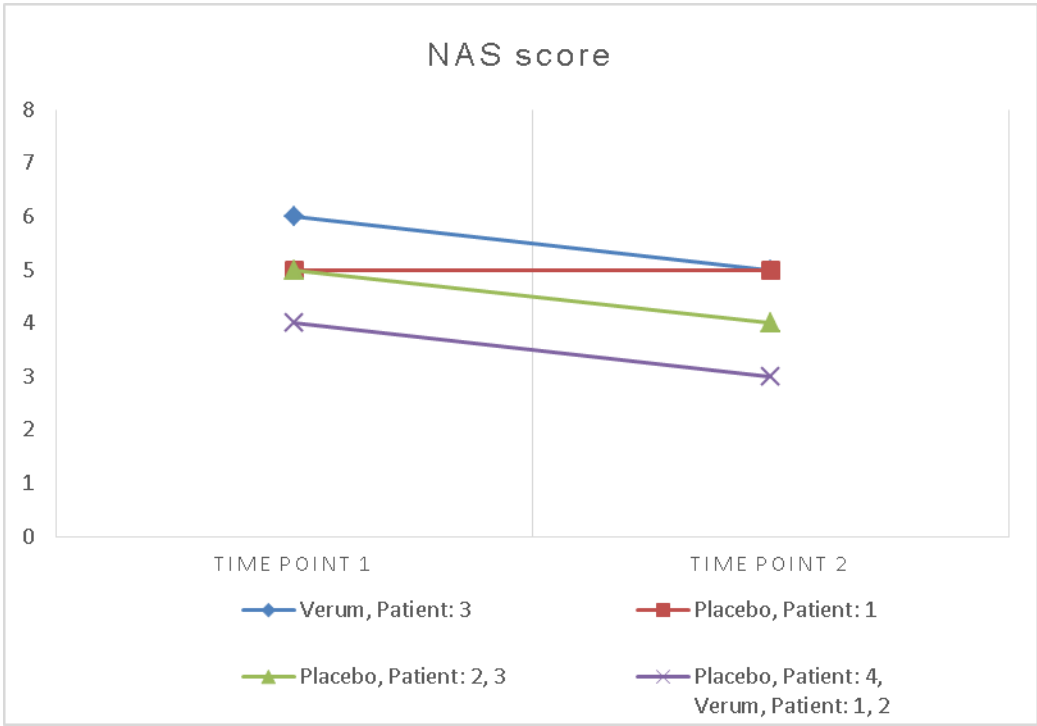

Supplementary Figure 1

E

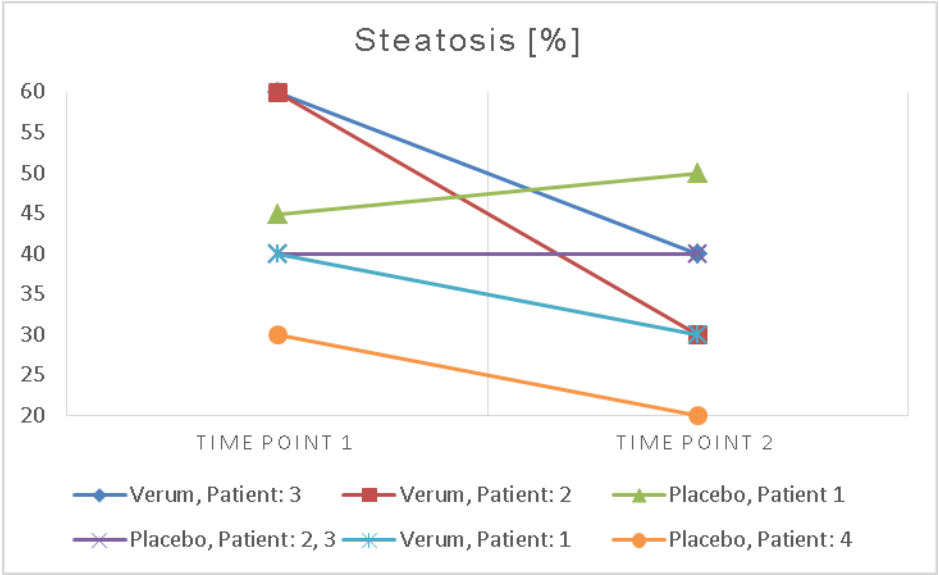

Supplementary Figure 1

F

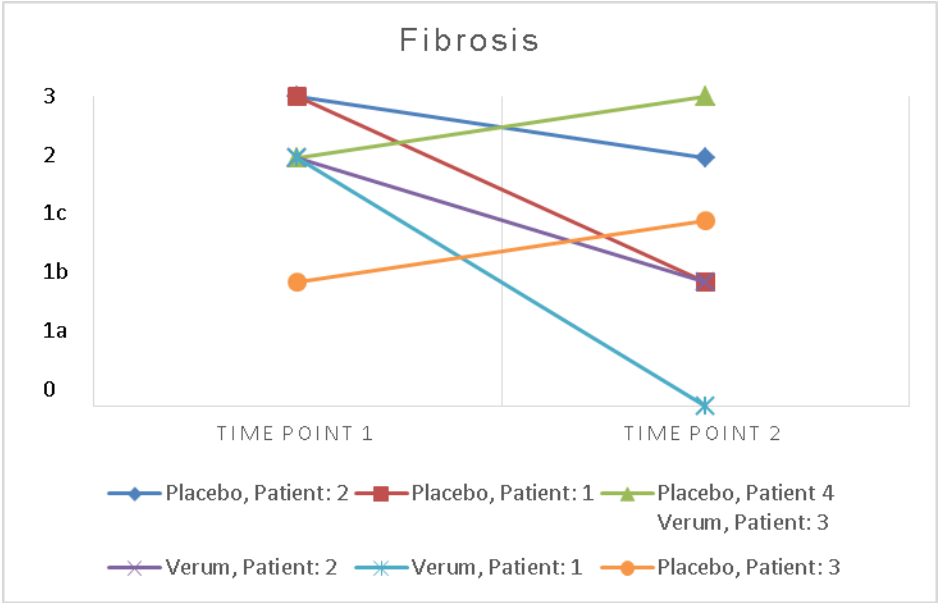

Supplement: Supplementary file 1 [file 13158350]
